# Supplementary material
Source: PubMed Central journal article supplement (PMC5575784)

# A

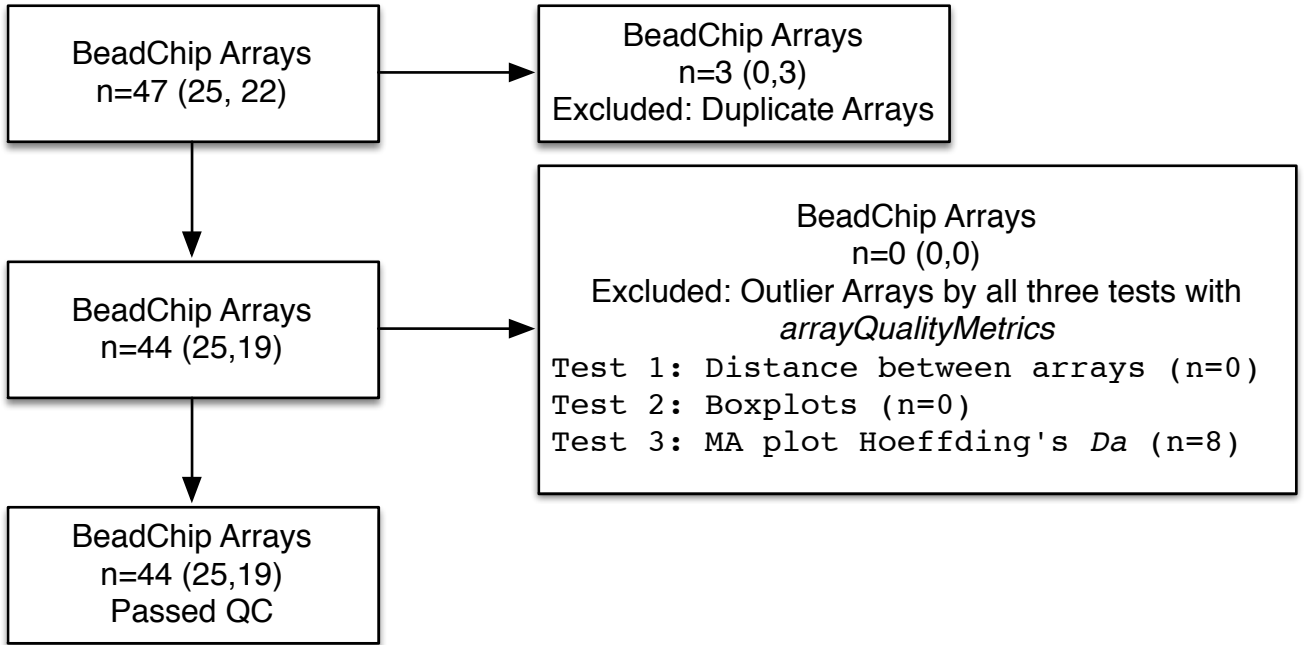

# B

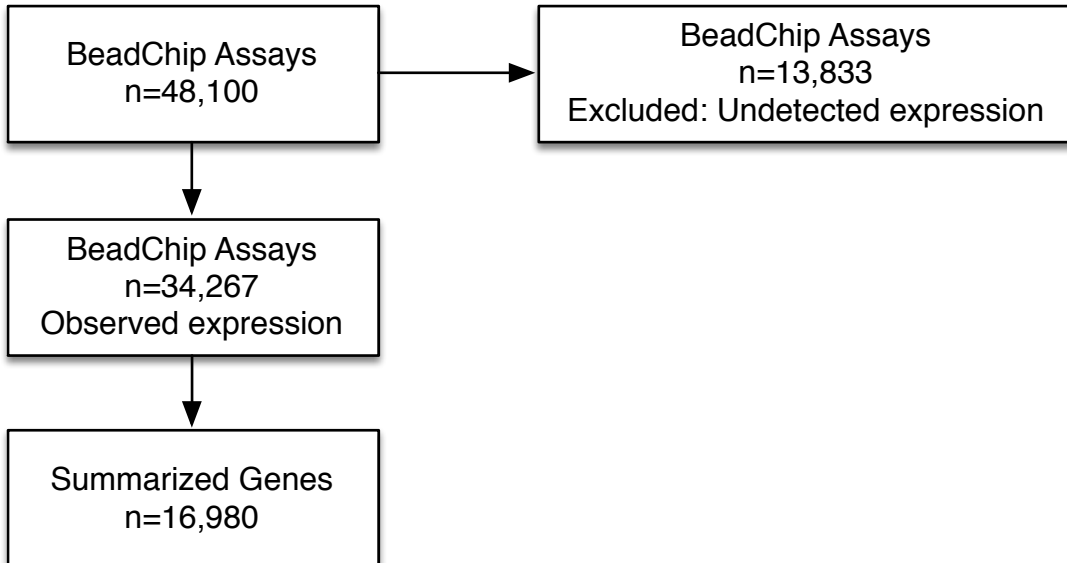

Supplement: NIHMS890702-supplement-Supplemental_File_2.pdf [file NIHMS890702-supplement-Supplemental_File_2.pdf]

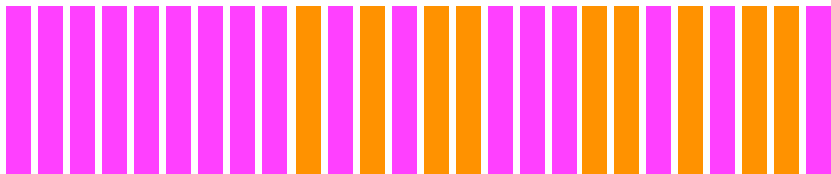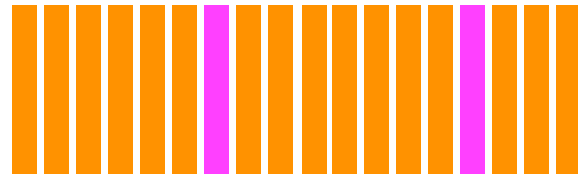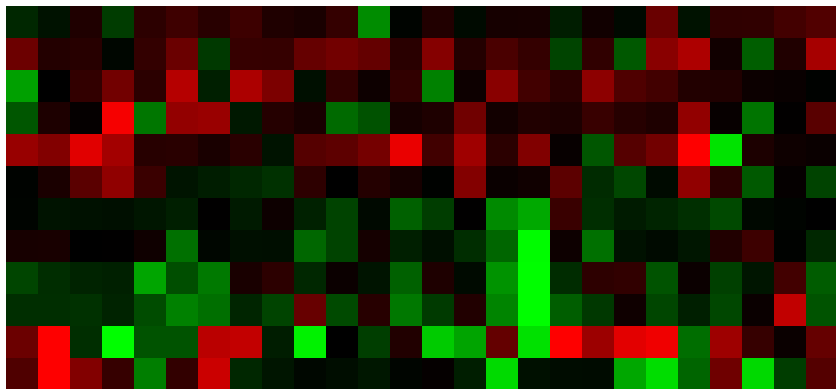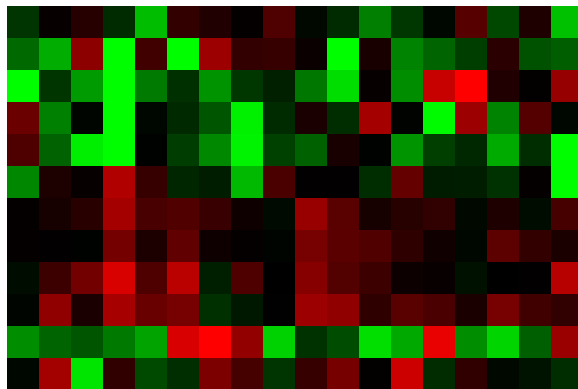

CAPNS1  
 DOK2  
 CTSZ  
 COMMD9  
 FBP1  
 ECH1  
 Clorf61  
 TCEAL1  
 DEFB103B  
 HS.362932  
 MGC13005  
 YIF1B

Supplement: NIHMS890702-supplement-Supplemental_File_4.pdf [file NIHMS890702-supplement-Supplemental_File_4.pdf]
